# Supplementary material for: PDAC-ANN: an artificial neural network to predict pancreatic ductal adenocarcinoma based on gene expression
Source: PubMed Central journal article supplement (PMC6995241; doi:10.1186/s12885-020-6533-0), 2020-01-31

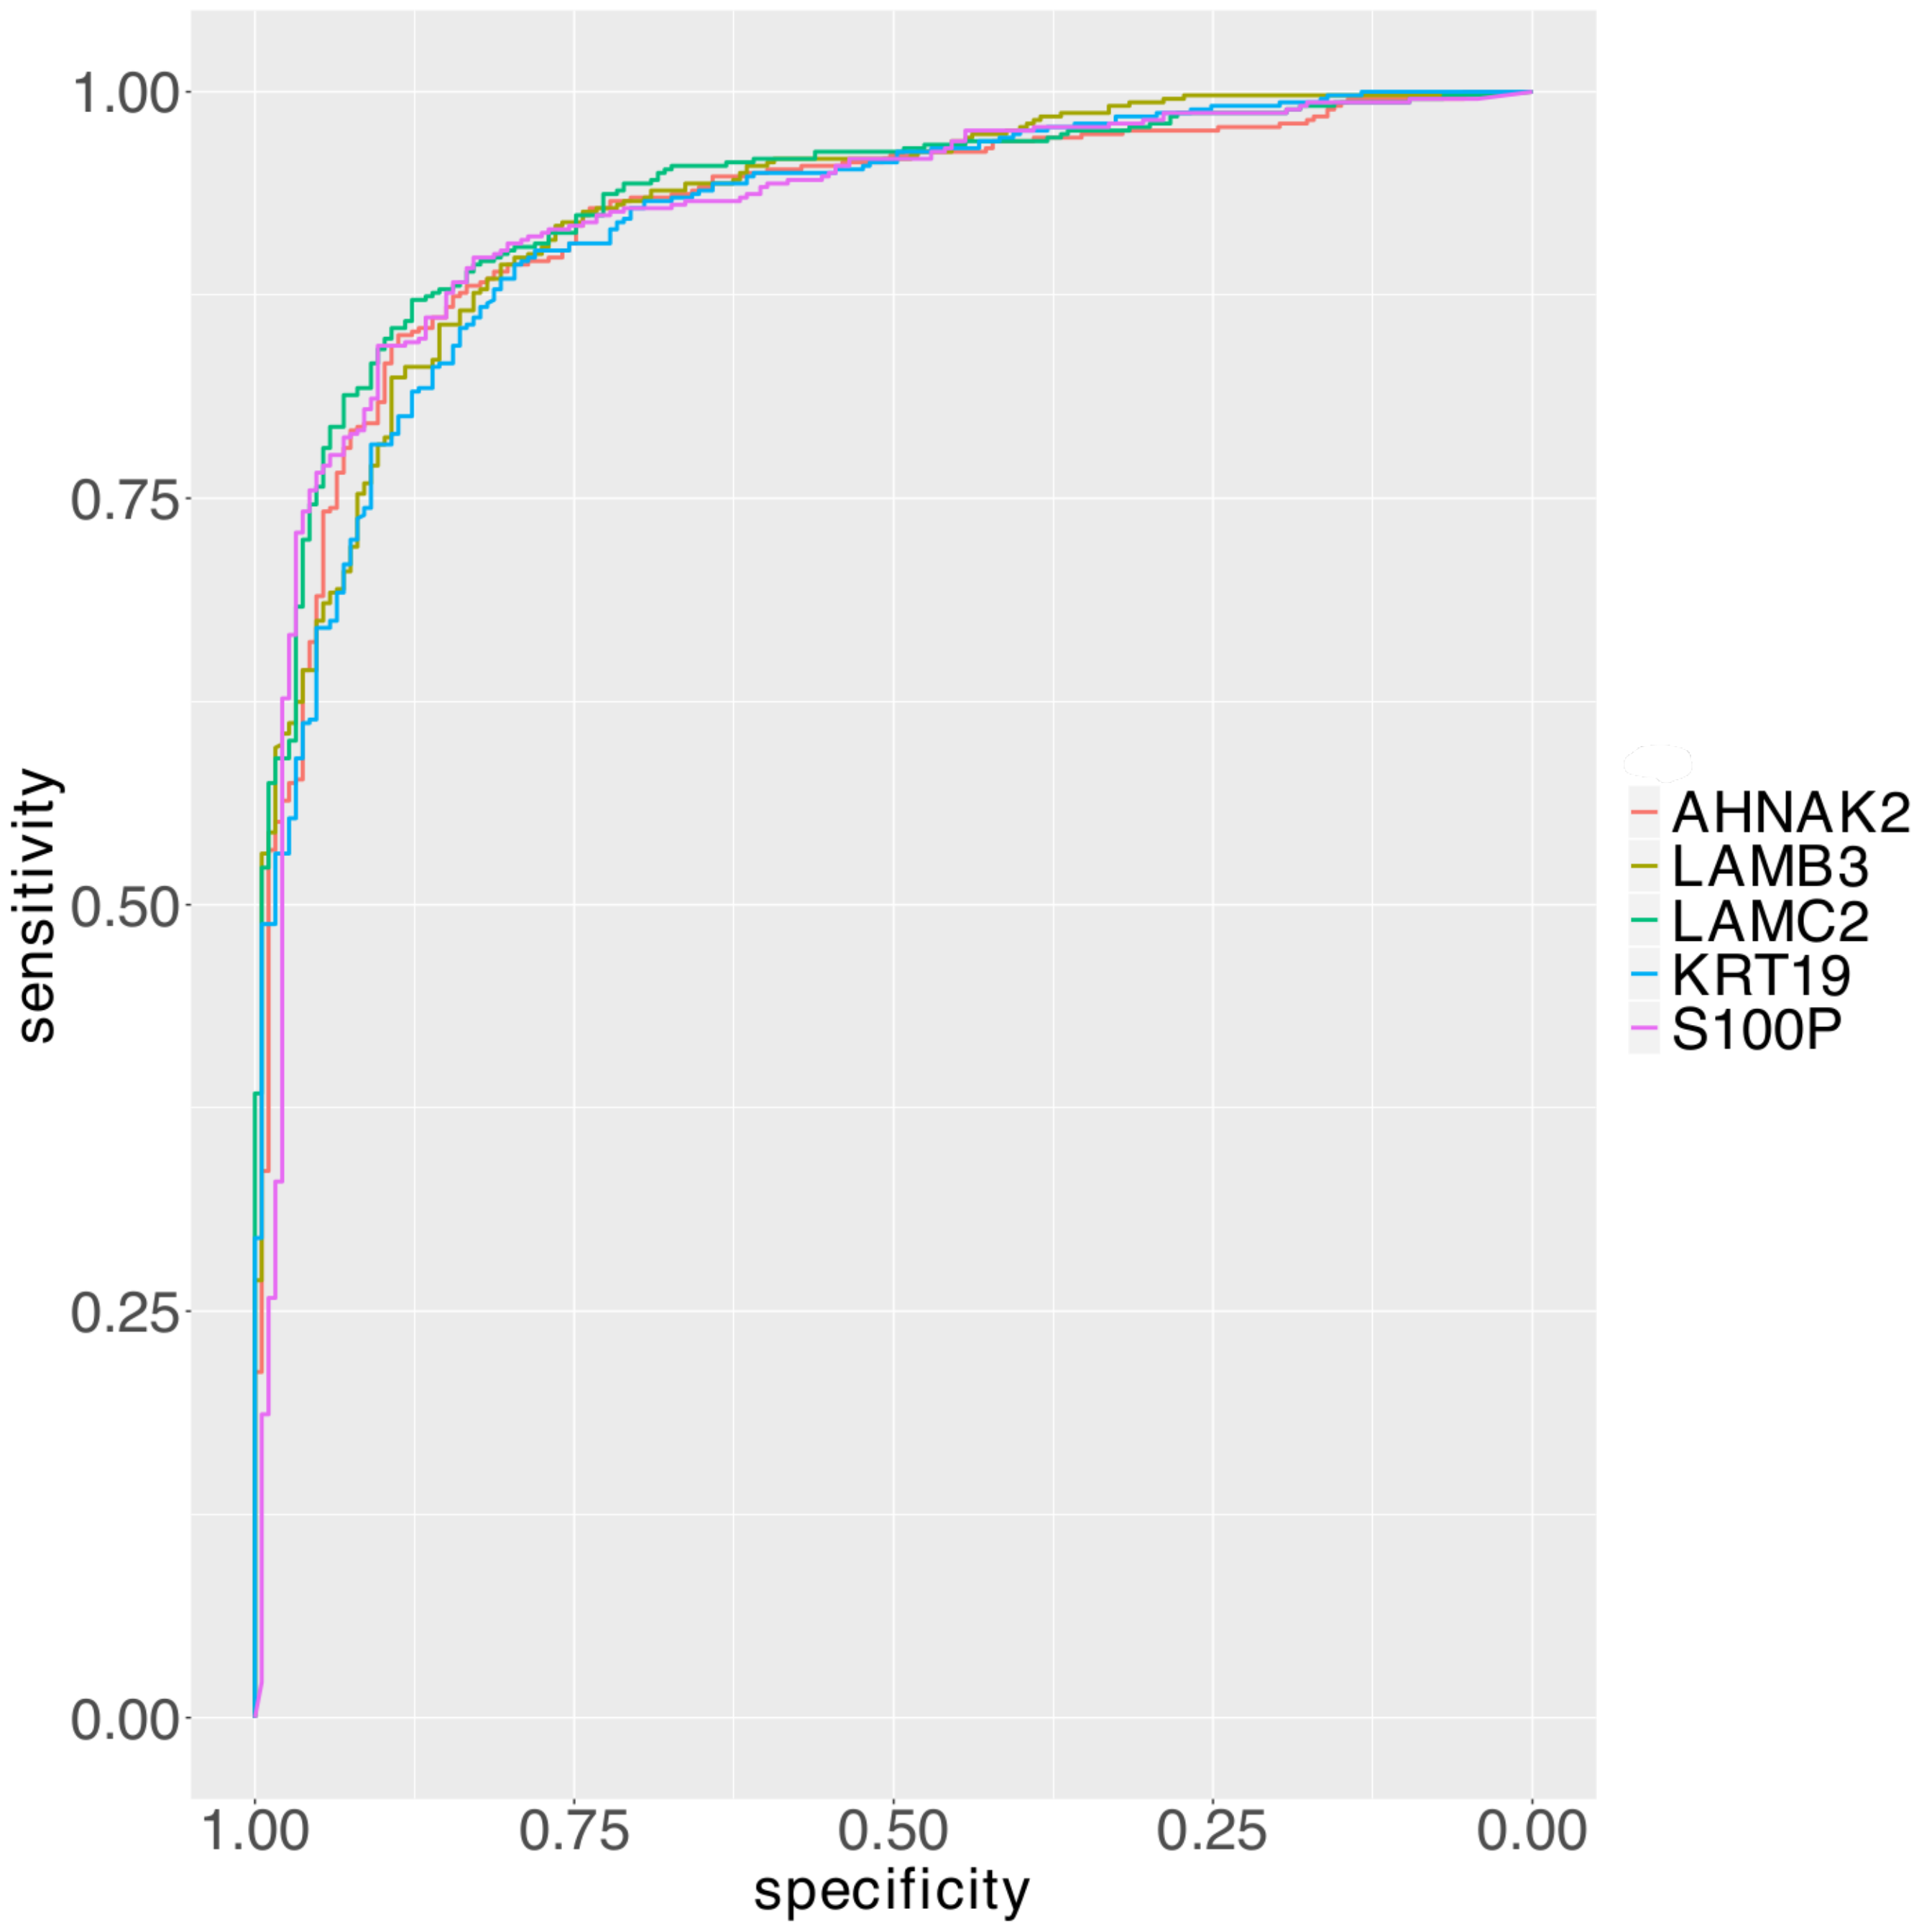

Supplement: 12885_2020_6533_MOESM4_ESM.pdf [file 12885_2020_6533_MOESM4_ESM.pdf]
